# Supplementary material for: A novel AHI-1–BCR-ABL–DNM2 complex regulates leukemic properties of primitive CML cells through enhanced cellular endocytosis and ROS-mediated autophagy
Source: PubMed Central journal article supplement — Leukemia. 2017 Apr 21;31(11):2376–87. doi: 10.1038/leu.2017.108 (PMC5668499; doi:10.1038/leu.2017.108), 2017-04-21
Supplement: leu2017108x1.pdf [file leu2017108x1.pdf]

**Supplementary Table 1: Overview of all primary CML samples used in this study**

| Patient No.                      | Age at diagnosis | Sex | WBC at diagnosis (x10 <sup>6</sup> /mL) | IM Response (disease progression) | Sample used for                                 |
|----------------------------------|------------------|-----|-----------------------------------------|-----------------------------------|-------------------------------------------------|
| <b><i>IM-nonresponders*:</i></b> |                  |     |                                         |                                   |                                                 |
| 1                                | 45               | M   | 392.3                                   | NR                                | Fig. 2a, 3, 4a, 4b, 6, 7, 8a, Suppl. Fig. 3, 10 |
| 2                                | 22               | M   | 212.8                                   | NR                                | Fig. 2a, 3, 4a, 4b, 6, 7, 8a, Suppl. Fig. 3     |
| 3                                | 55               | M   | 676.6                                   | NR                                | Fig. 2a, 3, 4a, 4b, 6, 7, 8a, Suppl. Fig. 3     |
| 4                                | 21               | M   | 202.9                                   | NR (BC)                           | Fig. 2a, 6, 7, Suppl. Fig. 10                   |
| 5                                | n/a              | M   | n/a                                     | NR                                | Fig. 6, 7, Suppl. Fig. 10                       |
| 6                                | 60               | F   | 492                                     | NR                                | Fig. 2a                                         |
| 7                                | 11               | M   | 160.5                                   | NR                                | Fig. 2a                                         |
| 8                                | 27               | M   | 480                                     | NR (BC)                           | Fig. 2a                                         |
| 9                                | 19               | F   | 355.5                                   | NR                                | Fig. 2a                                         |
| 10                               | 34               | M   | 174.6                                   | NR                                | Fig. 2a                                         |
| 11                               | 39               | M   | 186                                     | NR                                | Fig. 2a                                         |
| 12                               | 61               | M   | 200                                     | NR                                | Fig. 2a                                         |
| 13                               | 80               | F   | 172.8                                   | NR                                | Fig. 2a                                         |
| 14                               | 48               | M   | 140                                     | NR                                | Fig. 2a                                         |
| 15                               | 24               | M   | 88.7                                    | NR                                | Fig. 2a                                         |
| 16                               | 28               | M   | 225.2                                   | Non-compliant                     | Fig. 2a                                         |
| <b><i>IM-responders*:</i></b>    |                  |     |                                         |                                   |                                                 |
| 1                                | 32               | M   | 353.2                                   | R                                 | Fig. 2a, Suppl. Fig. 6b, 8b, 10                 |
| 2                                | 57               | M   | 450                                     | R                                 | Fig. 2a, Suppl. Fig. 6b, 8b, 10                 |
| 3                                | 79               | M   | 192.3                                   | R                                 | Suppl. Fig. 6b, 8b, 10                          |
| 4                                | 67               | M   | 163.5                                   | R                                 | Fig. 2a                                         |
| 5                                | 33               | M   | 165.9                                   | R                                 | Fig. 2a                                         |
| 6                                | 52               | M   | 202.3                                   | R                                 | Fig. 2a                                         |
| 7                                | 42               | F   | 175.1                                   | R                                 | Fig. 2a                                         |
| 8                                | 35               | M   | 338.3                                   | R                                 | Fig. 2a                                         |
| 9                                | 58               | M   | 42.5                                    | R                                 | Fig. 2a                                         |
| 10                               | 56               | F   | 301.6                                   | R                                 | Fig. 2a                                         |
| 11                               | n/a              | M   | n/a                                     | R                                 | Fig. 2a                                         |
| 12                               | 39               | M   | 203.2                                   | R                                 | Fig. 2a                                         |

\*IM-responders (R) and IM-nonresponders (NR) were classified based on the European Leukemia Net guidelines where IM responders achieved complete hematologic remission within 3 months, major cytogenetic remission within 12 months, and complete cytogenetic remission within 18 months<sup>6, 33</sup>. Conversely, IM-nonresponders did not achieve one or more of these response criteria, had evidence of loss of a complete hematologic response or a complete cytogenetic response, or developed blast crisis (BC). n/a= data not available.

**Supplementary Table 2: Primary antibodies used in this study**

| Antibody             | Supplier                           | Antibody                    | Supplier                         |
|----------------------|------------------------------------|-----------------------------|----------------------------------|
| anti-HA tag          | applied biological materials (ABM) | anti-Myc tag                | cell signaling Technology (CST0) |
| anti-Myc tag         | Abcam                              | anti-DNM2                   | Abcam                            |
| anti-ABL (8E9)       | BD Biosciences                     | anti-phosphotyrosine (4G10) | Millipore                        |
| Anti-JAK2            | CST                                | anti-phospho-JAK2           | CST                              |
| anti-STAT5           | CST                                | anti-phospho-STAT5          | Abcam                            |
| anti-AKT             | CST                                | anti-phospho-AKT            | CST                              |
| anti-ERK             | CST                                | anti-phospho-ERK            | Santa Cruz Biotechnology         |
| anti- $\beta$ -actin | ABM                                | anti-ULK-1                  | CST                              |
| anti-Bec1in-1        | CST                                | anti-LC3B                   | CST                              |
| anti-p62             | Sigma-Aldrich                      | anti-EEA1                   | CST                              |
| Anti- LAMP-1         | CST                                |                             |                                  |
